# Supplementary material for: The YSQ-R: Predictive Validity and Comparison to the Short and Long Form Young Schema Questionnaire
Source: MDPI journal article supplement (doi:10.3390/ijerph20031778), 2023-01-18
Supplement: s1 [file s1]

Young Schema Questionnaire-Revised (YSQ-R). Normative Data in an Australian Population

Means and Standard Deviations for Early Maladaptive Schemas (EMS) in Three Psychiatric and a Non-Clinical Group. Total Sample (N= 857).

| EMS                       | Clinical Total |        | Non-Clinical |        | PTSD  |         | Schema |        | Alcohol/Substance |        |
|---------------------------|----------------|--------|--------------|--------|-------|---------|--------|--------|-------------------|--------|
|                           | Means          | (SD)   | Means        | (SD)   | Means | (SD)    | Means  | (SD)   | Means             | (SD)   |
| Emotional Deprivation     | 3.21           | (1.36) | 2.75         | (1.36) | 3.15  | (1.24)  | 3.60   | (1.38) | 3.02              | (1.42) |
| Abandonment               | 2.85           | (1.17) | 2.20         | (1.11) | 2.78  | (1.18)  | 3.33   | (1.20) | 2.59              | (1.03) |
| Mistrust/Abuse            | 2.88           | (1.22) | 2.39         | (1.11) | 3.20  | (1.29)  | 2.81   | (1.15) | 2.62              | (1.13) |
| Social Isolation          | 3.43           | (1.42) | 2.86         | (1.30) | 3.64  | (1.38)  | 3.84   | (1.32) | 2.97              | (1.40) |
| Defectiveness             | 3.01           | (1.38) | 2.22         | (1.33) | 3.03  | (1.39)  | 3.57   | (1.33) | 2.63              | (1.29) |
| Failure                   | 3.11           | (1.45) | 2.32         | (1.22) | 2.89  | (1.40)  | 3.86   | (1.43) | 2.83              | (1.33) |
| Dependence                | 2.75           | (1.25) | 2.06         | (1.12) | 2.63  | (1.220) | 3.23   | (1.27) | 2.53              | (1.19) |
| Vulnerability to Harm     | 2.84           | (1.18) | 2.40         | (1.14) | 3.25  | (1.240) | 2.54   | (1.13) | 2.56              | (1.02) |
| Enmeshment                | 2.01           | (1.02) | 1.78         | (.97)  | 1.69  | (0.82)  | 2.24   | (1.11) | 2.16              | (1.06) |
| Subjugation               | 3.25           | (1.26) | 2.34         | (1.12) | 2.93  | (1.25)  | 3.53   | (1.26) | 3.37              | (1.21) |
| Self-Sacrifice            | 3.74           | (1.15) | 3.38         | (1.16) | 3.61  | (1.11)  | 4.02   | (1.22) | 3.68              | (1.12) |
| Unrelenting Standards     | 3.40           | (1.37) | 3.09         | (1.06) | 3.98  | (1.32)  | 3.65   | (1.25) | 2.97              | (1.29) |
| Entitlement               | 3.25           | (1.39) | 2.41         | (0.97) | 4.05  | (1.33)  | 2.42   | (1.08) | 2.80              | (1.22) |
| Insufficient Self Control | 3.65           | (1.18) | 2.55         | (1.07) | 3.73  | (1.15)  | 3.31   | (1.13) | 3.57              | (1.16) |
| Approval Seeking          | 2.74           | (1.12) | 2.57         | (1.16) | 2.88  | (1.12)  | 3.65   | (1.30) | 2.82              | (1.10) |
| Negativity/Pessimism      | 3.47           | (1.18) | 2.97         | (1.29) | 3.53  | (1.17)  | 3.50   | (1.28) | 3.52              | (1.21) |
| Fear of Losing Control    | 3.21           | (1.27) | 2.32         | (1.25) | 2.97  | (1.21)  | 3.21   | (1.30) | 3.15              | (1.23) |
| Emotional Constriction    | 3.21           | (1.25) | 2.71         | (1.36) | 3.26  | (1.25)  | 2.77   | (1.18) | 2.96              | (1.20) |
| Punitiveness (Self)       | 3.19           | (1.36) | 2.67         | (1.09) | 3.47  | (1.37)  | 3.22   | (1.44) | 2.91              | (1.22) |
| Punitiveness (Other)      | 3.05           | (1.16) | 2.99         | (1.16) | 3.13  | (1.17)  | 2.92   | (1.11) | 3.05              | (1.17) |

*Note:* Total Sample (N= 857), Clinical Total (N= 593), Non-Clinical (N= 264), PTSD = Post-Traumatic Stress Disorder (N= 218; The PTSD sample was predominantly Australian military veterans and first responders), Schema (N= 150; The Schema sample was predominantly patients diagnosed with borderline personality disorder), Alcohol/Substance Use (N= 225). Please use the following to cite this table DOI: <https://doi.org/10.3390/ijerph20031778>
