# Supplementary material for: The YSQ-R: Predictive Validity and Comparison to the Short and Long Form Young Schema Questionnaire
Source: MDPI journal article supplement (doi:10.3390/ijerph20031778), 2023-01-18
Supplement: s1 [file s1]

Supplementary Table S1

Alpha Coefficients, Means and Standard Deviations for Early Maladaptive Schemas (EMS) for the Schema Group ( $n= 150$ )

| (EMS)                     | YSQ-L3             |                | YSQ-S3             |                | YSQ-R              |                |
|---------------------------|--------------------|----------------|--------------------|----------------|--------------------|----------------|
|                           | Alpha ( $\alpha$ ) | Means ( $SD$ ) | Alpha ( $\alpha$ ) | Means ( $SD$ ) | Alpha ( $\alpha$ ) | Means ( $SD$ ) |
| Emotional Deprivation     | .95                | 3.66 (1.36)    | .92                | 3.71 (1.44)    | .91                | 3.60 (1.38)    |
| Abandonment               | .93                | 3.39 (1.16)    | .90                | 3.41 (1.44)    | .88                | 3.33 (1.20)    |
| Mistrust/Abuse            | .93                | 3.16 (1.09)    | .90                | 3.18 (1.34)    | .80                | 2.81 (1.15)    |
| Social Isolation          | .91                | 3.83 (1.20)    | .93                | 4.06 (1.38)    | .88                | 3.84 (1.32)    |
| Defectiveness             | .95                | 3.40 (1.23)    | .91                | 3.49 (1.44)    | .90                | 3.57 (1.33)    |
| Failure                   | .95                | 3.77 (1.40)    | .94                | 3.57 (1.54)    | .93                | 3.86 (1.43)    |
| Dependence/Incompetence   | .95                | 3.08 (1.21)    | .85                | 2.80 (1.21)    | .92                | 3.23 (1.27)    |
| Vulnerability to Harm     | .89                | 2.77 (1.04)    | .78                | 2.53 (1.13)    | .79                | 2.54 (1.13)    |
| Enmeshment                | .90                | 2.28 (1.10)    | .80                | 2.21 (1.16)    | .85                | 2.24 (1.11)    |
| Subjugation               | .92                | 3.47 (1.20)    | .89                | 3.51 (1.31)    | .85                | 3.53 (1.26)    |
| Self-Sacrifice            | .93                | 3.97 (1.07)    | .92                | 3.69 (1.19)    | .86                | 4.02 (1.22)    |
| Emotional Inhibition      | .84                | 2.97 (1.03)    | .85                | 2.77 (1.18)    | .82                | -              |
| Unrelenting Standards     | .93                | 3.62 (1.12)    | .84                | 4.11 (1.21)    | .88                | 3.65 (1.25)    |
| Entitlement               | .90                | 2.32 (.99)     | .86                | 2.21 (1.09)    | .82                | 2.42 (1.08)    |
| Insufficient Self Control | .91                | 3.23 (1.04)    | .86                | 3.45 (1.24)    | .85                | 3.31 (1.13)    |
| Approval Seeking          | .93                | 3.31 (1.13)    | .87                | 2.97 (1.27)    | .88                | 3.65 (1.30)    |
| Negativity/Pessimism      | .92                | 3.65 (1.22)    | .90                | 3.59 (1.43)    | .87                | 3.50 (1.28)    |
| Punitiveness              | .91                | 3.35 (1.04)    | .92                | 3.31 (1.24)    | .92                | -              |
| Fear of Losing Control    | -                  | -              | -                  | -              | .82                | 3.21 (1.30)    |
| Emotional Constriction    | -                  | -              | -                  | -              | .85                | 2.77 (1.18)    |
| Punitiveness (Self)       | -                  | -              | -                  | -              | .93                | 3.22 (1.44)    |
| Punitiveness (Other)      | -                  | -              | -                  | -              | .79                | 2.92 (1.11)    |

Supplementary Table S2

Alpha Coefficients, Means and Standard Deviations for Early Maladaptive Schemas (EMS) for the PTSD group ( $n=103$ )

| (EMS)                     | YSQ-L3             |                | YSQ-S3             |                | YSQ-R              |                |
|---------------------------|--------------------|----------------|--------------------|----------------|--------------------|----------------|
|                           | Alpha ( $\alpha$ ) | Means ( $SD$ ) | Alpha ( $\alpha$ ) | Means ( $SD$ ) | Alpha ( $\alpha$ ) | Means ( $SD$ ) |
| Emotional Deprivation     | .92                | 3.16 (1.26)    | .89                | 3.16 (1.33)    | .85                | 3.1 (1.27)     |
| Abandonment               | .92                | 2.85 (1.13)    | .89                | 2.74 (1.39)    | .85                | 2.76 (1.17)    |
| Mistrust/Abuse            | .94                | 3.33 (1.16)    | .88                | 3.44 (1.38)    | .83                | 3.13 (1.29)    |
| Social Isolation          | .93                | 3.58 (1.31)    | .94                | 3.92 (1.47)    | .88                | 3.67 (1.35)    |
| Defectiveness             | .95                | 2.95 (1.29)    | .93                | 2.99 (1.52)    | .92                | 2.98 (1.45)    |
| Failure                   | .94                | 2.85 (1.4)     | .92                | 2.66 (1.41)    | .92                | 2.88 (1.43)    |
| Dependence/Incompetence   | .94                | 2.62 (1.13)    | .77                | 2.45 (1.1)     | .89                | 2.68 (1.21)    |
| Vulnerability to Harm     | .91                | 2.86 (1.31)    | .89                | 2.68 (1.36)    | .90                | 2.66 (1.41)    |
| Enmeshment                | .91                | 2.4 (1.06)     | .75                | 2.57 (1.08)    | .84                | 2.56 (1.1)     |
| Subjugation               | .87                | 3.06 (1.15)    | .82                | 3.11 (1.28)    | .72                | 2.78 (1.12)    |
| Self-Sacrifice            | .89                | 2.1 (0.81)     | .75                | 1.66 (0.93)    | .64                | 2.22 (0.85)    |
| Emotional Inhibition      | .85                | 2.99 (1.07)    | .75                | 3.31 (1.15)    | -                  | -              |
| Unrelenting Standards     | .85                | 3.62 (0.88)    | .60                | 3.51 (0.99)    | .79                | 3.8 (1.07)     |
| Entitlement               | .85                | 3.74 (1.15)    | .83                | 3.92 (1.35)    | .78                | 3.68 (1.21)    |
| Insufficient Self Control | .90                | 3.45 (1.07)    | .79                | 3.66 (1.23)    | .86                | 3.32 (1.23)    |
| Approval Seeking          | .88                | 2.86 (0.98)    | .70                | 2.93 (1.1)     | .77                | 2.85 (1.12)    |
| Negativity/Pessimism      | .86                | 3.44 (1.07)    | .75                | 3.72 (1.14)    | .75                | 3.51 (1.09)    |
| Punitiveness              | .92                | 2.58 (1.09)    | .84                | 3.01 (1.29)    | -                  | -              |
| Fear of Losing Control    | -                  | -              | -                  | -              | .84                | 2.55 (1.26)    |
| Emotional Constriction    | -                  | -              | -                  | -              | .71                | 3.02 (1.12)    |
| Punitiveness (Self)       | -                  | -              | -                  | -              | .84                | 2.67 (1.26)    |
| Punitiveness (Other)      | -                  | -              | -                  | -              | .66                | 2.72 (1.06)    |

Supplementary Table S3

Alpha Coefficients, Means and Standard Deviations for Early Maladaptive Schemas (EMS) for the Alcohol group ( $n= 169$ )

| (EMS)                     | YSQ-L3             |                | YSQ-S3             |                | YSQ-R              |                |
|---------------------------|--------------------|----------------|--------------------|----------------|--------------------|----------------|
|                           | Alpha ( $\alpha$ ) | Means ( $SD$ ) | Alpha ( $\alpha$ ) | Means ( $SD$ ) | Alpha ( $\alpha$ ) | Means ( $SD$ ) |
| Emotional Deprivation     | .95                | 3.15 (1.42)    | .91                | 3.17 (1.48)    | .90                | 3.07 (1.44)    |
| Abandonment               | .91                | 2.83 (1.07)    | .87                | 3.01 (1.37)    | .82                | 2.71 (1.08)    |
| Mistrust/Abuse            | .92                | 2.85 (1.1)     | .86                | 2.86 (1.31)    | .80                | 2.49 (1.15)    |
| Social Isolation          | .93                | 3.02 (1.36)    | .93                | 3.13 (1.53)    | .90                | 3.09 (1.46)    |
| Defectiveness             | .94                | 2.68 (1.19)    | .87                | 3.10 (1.19)    | .90                | 2.60 (1.31)    |
| Failure                   | .94                | 2.71 (1.36)    | .93                | 2.52 (1.43)    | .92                | 2.75 (1.39)    |
| Dependence/Incompetence   | .93                | 2.5 (1.11)     | .75                | 2.35 (1.04)    | .90                | 2.60 (1.20)    |
| Vulnerability to Harm     | .88                | 2.59 (1.03)    | .77                | 2.47 (1.15)    | .70                | 2.5 (1.05)     |
| Enmeshment                | .89                | 2.05 (1.03)    | .84                | 2.00 (1.20)    | .82                | 2.06 (1.04)    |
| Subjugation               | .88                | 3.05 (1.14)    | .82                | 2.98 (1.24)    | .79                | 3.16 (1.21)    |
| Self-Sacrifice            | .91                | 3.81 (1.03)    | .82                | 3.63 (1.25)    | .85                | 3.77 (1.19)    |
| Emotional Inhibition      | .86                | 2.9 (1.16)     | .88                | 2.64 (1.36)    | -                  | -              |
| Unrelenting Standards     | .90                | 3.45 (1.07)    | .78                | 3.79 (1.19)    | .82                | 3.42 (1.15)    |
| Entitlement               | .87                | 2.71 (1.03)    | .81                | 2.77 (1.18)    | .78                | 2.85 (1.10)    |
| Insufficient Self Control | .90                | 3.45 (1.04)    | .83                | 3.49 (1.28)    | .83                | 3.57 (1.16)    |
| Approval Seeking          | .91                | 3.09 (1.09)    | .85                | 2.99 (1.21)    | .82                | 3.18 (1.26)    |
| Negativity/Pessimism      | .90                | 3.06 (1.17)    | .86                | 3.14 (1.33)    | .82                | 2.92 (1.19)    |
| Punitiveness              | .90                | 3.17 (1.05)    | .83                | 2.84 (1.25)    | -                  | -              |
| Fear of Losing Control    |                    | -              |                    | -              | .79                | 3.22 (1.34)    |
| Emotional Constriction    |                    | -              |                    | -              | .88                | 2.64 (1.36)    |
| Punitiveness (Self)       |                    | -              |                    | -              | .83                | 2.88 (1.24)    |
| Punitiveness (Other)      |                    | -              |                    | -              | .78                | 3.08 (1.18)    |

Supplementary Table S4

Alpha Coefficients, Means and Standard Deviations for Early Maladaptive Schemas (EMS) for the Non-Clinical Group ( $n= 264$ )

| (EMS)                     | YSQ-L3             |                | YSQ-S3             |                | YSQ-R              |                |
|---------------------------|--------------------|----------------|--------------------|----------------|--------------------|----------------|
|                           | Alpha ( $\alpha$ ) | Means ( $SD$ ) | Alpha ( $\alpha$ ) | Means ( $SD$ ) | Alpha ( $\alpha$ ) | Means ( $SD$ ) |
| Emotional Deprivation     | .95                | 2.78 (1.33)    | .93                | 2.80 (1.45)    | .91                | 2.75 (1.36)    |
| Abandonment               | .95                | 2.34 (1.09)    | .90                | 2.30 (1.25)    | .90                | 2.20 (1.11)    |
| Mistrust/Abuse            | .94                | 2.67 (1.07)    | .89                | 2.81 (1.25)    | .85                | 2.39 (1.11)    |
| Social Isolation          | .94                | 2.78 (1.24)    | .93                | 3.05 (1.39)    | .90                | 2.86 (1.30)    |
| Defectiveness             | .96                | 2.19 (1.20)    | .89                | 2.65 (1.28)    | .95                | 2.22 (1.33)    |
| Failure                   | .95                | 2.25 (1.21)    | .94                | 2.18 (1.26)    | .93                | 2.32 (1.22)    |
| Dependence/Incompetence   | .96                | 2.01 (1.07)    | .84                | 1.90 (1.01)    | .93                | 2.06 (1.12)    |
| Vulnerability to Harm     | .94                | 2.38 (1.14)    | .88                | 2.24 (1.20)    | .84                | 2.40 (1.14)    |
| Enmeshment                | .93                | 1.76 (.94)     | .85                | 1.78 (0.99)    | .89                | 1.78 (.97)     |
| Subjugation               | .93                | 2.31 (1.09)    | .90                | 2.22 (1.13)    | .86                | 2.34 (1.12)    |
| Self-Sacrifice            | .93                | 3.42 (1.01)    | .84                | 3.27 (1.19)    | .86                | 3.38 (1.16)    |
| Emotional Inhibition      | .89                | 2.54 (1.13)    | .90                | 2.71 (1.36)    | -                  | -              |
| Unrelenting Standards     | .93                | 3.02 (1.08)    | .82                | 3.40 (1.17)    | .88                | 3.09 (1.06)    |
| Entitlement               | .89                | 2.35 (.93)     | .81                | 2.31 (1.01)    | .80                | 2.41 (0.97)    |
| Insufficient Self Control | .93                | 2.44 (1.00)    | .87                | 2.57 (1.16)    | .87                | 2.55 (1.07)    |
| Approval Seeking          | .95                | 2.5 (1.13)     | .88                | 2.52 (1.14)    | .89                | 2.57 (1.16)    |
| Negativity/Pessimism      | .95                | 2.98 (1.07)    | .92                | 3.12 (1.39)    | .91                | 2.97 (1.29)    |
| Punitiveness              | .93                | 2.92 (1.04)    | .86                | 2.73 (1.13)    | -                  | -              |
| Fear of Losing Control    | -                  | -              | -                  | -              | .86                | 2.32 (1.25)    |
| Emotional Constriction    | -                  | -              | -                  | -              | .91                | 2.71 (1.36)    |
| Punitiveness (Self)       | -                  | -              | -                  | -              | .85                | 2.67 (1.09)    |
| Punitiveness (Other)      | -                  | -              | -                  | -              | .81                | 2.99 (1.16)    |



|        |                |   |   |   |   |      |     |     |
|--------|----------------|---|---|---|---|------|-----|-----|
| Step 2 | (YSQ-R total)  | - | - | - | - | 1.13 | .08 | .09 |
| Step 1 |                | - | - | - | - | -    | -   | -   |
| Step 2 | (YSQ-L3 total) | - | - | - | - | 1.07 | .08 | .09 |
| Step 1 |                | - | - | - | - | -    | -   | -   |
| Step 2 | (YSQ-S3 total) | - | - | - | - | .82  | .06 | .06 |
| Step 1 |                | - | - | - | - | -    | -   | -   |

*Note.* \*= Correlation is significant at the 0.01 level (2-tailed). \*\*= Correlation is significant at the 0.05 level (2-tailed).  
YSQ = Young Schema Questionnaire. *B*= Unstandardised Coefficient, *SE*=Standard Error,  $\beta$ =Standardised Beta Coefficient,  $R^2$ =R squared,  $f^2$  = Cohens *f*, VIF = Variance Inflation Factor where a VIF of 1 = No correlation, < 3 = low correlation, > 5 = high correlation).

Supplementary Table S6

Regression Analysis for Schema Change and Symptom Change for the YSQ-R and SCL-90 Subscales in the Schema Group

| YSQ-R                            |          |           |         |          |          |                |       |      |
|----------------------------------|----------|-----------|---------|----------|----------|----------------|-------|------|
| SCL-90 Subscales                 | <i>B</i> | <i>SE</i> | $\beta$ | <i>t</i> | <i>F</i> | $R^2$ (Change) | $f^2$ | VIF  |
| Step 1                           |          |           |         |          |          |                |       |      |
| <b>GSI</b>                       | -        | -         | -       | -        | 3.76     | .37*           | .59   | -    |
| Step 2                           |          |           |         |          |          |                |       |      |
| Failure                          | .380     | .083      | .376    | 4.60     | -        | .28**          | .39   | 1.45 |
| Emotional Constriction           | .238     | .095      | .183    | 2.49     | -        | .04*           | .04   | 1.72 |
| Social Isolation                 | .163     | .079      | .169    | 2.06     | -        | .02*           | .02   | 1.48 |
| Step 1                           |          |           |         |          |          |                |       |      |
| <b>Somatisation</b>              | -        | -         | -       | -        | .72      | .10            | .11   | -    |
| Step 2                           |          |           |         |          |          |                |       |      |
| Punitiveness (Other)             | .382     | .151      | .204    | 2.53     | -        | .04*           | .04   | 1.00 |
| Step 1                           |          |           |         |          |          |                |       |      |
| <b>Obsessive/Compulsive</b>      | -        | -         | -       | -        | 3.25     | .34**          | .52   | -    |
| Step 2                           |          |           |         |          |          |                |       |      |
| Dependence                       | .495     | .144      | .306    | 3.44     | -        | .21**          | .27   | 1.55 |
| Failure                          | .333     | .115      | .258    | 2.89     | -        | .04*           | .04   | 1.55 |
| Step 1                           |          |           |         |          |          |                |       |      |
| <b>Interpersonal Sensitivity</b> | -        | -         | -       | -        | 4.99     | .44**          | .79   | -    |
| Step 2                           |          |           |         |          |          |                |       |      |
| Failure                          | .464     | .125      | .304    | 3.72     | -        | .29**          | .41   | 1.59 |
| Social Isolation                 | .295     | .114      | .203    | 2.57     | -        | .04*           | .04   | 1.48 |
| Enmeshment                       | .278     | .094      | .206    | 2.95     | -        | .04*           | .04   | 1.60 |
| Emotional Constriction           | .305     | .138      | .156    | 2.21     | -        | .02*           | .02   | 1.18 |
| Step 1                           |          |           |         |          |          |                |       |      |
| <b>Depression</b>                | -        | -         | -       | -        | 3.06     | .32**          | .47   | -    |
| Step 2                           |          |           |         |          |          |                |       |      |
| Failure                          | .375     | .159      | .229    | 2.37     | -        | .20**          | .25   | 1.85 |
| Social Isolation                 | .300     | .133      | .193    | 2.51     | -        | .03*           | .03   | 1.44 |
| Dependence                       | .405     | .184      | .198    | 2.20     | -        | .02*           | .02   | 1.56 |
| Step 1                           |          |           |         |          |          |                |       |      |
| <b>Anxiety</b>                   | -        | -         | -       | -        | 2.74     | .30**          | .43   | -    |
| Step 2                           |          |           |         |          |          |                |       |      |
| Failure                          | .481     | .107      | .355    | 4.49     | -        | .15*           | .18   | 1.16 |
| Emotional Constriction           | .459     | .139      | .263    | 3.29     | -        | .04*           | .04   | 1.18 |
| Emotional Deprivation            | -.178    | .085      | -.165   | -2.10    | -        | .02*           | .02   | 1.15 |
| Step 1                           |          |           |         |          |          |                |       |      |
| <b>Hostility</b>                 | -        | -         | -       | -        | 2.49     | .26*           | .35   | -    |
| Step 2                           |          |           |         |          |          |                |       |      |
| Failure                          | .468     | .111      | .335    | 4.23     | -        | .15**          | .18   | 1.11 |
| Emotional Constriction           | .314     | .142      | .174    | 2.20     | -        | .03*           | .03   | 1.11 |

|        |                          |      |      |      |      |      |       |     |      |
|--------|--------------------------|------|------|------|------|------|-------|-----|------|
| Step 1 | <b>Phobic anxiety</b>    | -    | -    | -    | -    | 1.59 | .20   | .25 | -    |
| Step 2 | Social Isolation         | .258 | .106 | .208 | 2.43 | -    | .08** | .09 | 1.21 |
|        | Dependence               | .315 | .139 | .194 | 2.26 | -    | .03*  | .03 | 1.21 |
| Step 1 | <b>Paranoid ideation</b> | -    | -    | -    | -    | 2.44 | .28** | .39 | -    |
| Step 2 | Failure                  | .713 | .114 | .458 | 6.26 | -    | .21** | .27 | 1.00 |
| Step 1 | <b>Psychoticism</b>      | -    | -    | -    | -    | 3.12 | .33** | .49 | -    |
| Step 2 | Failure                  | .306 | .091 | .285 | 3.36 | -    | .19** | .23 | 1.40 |
|        | Abandonment              | .299 | .125 | .200 | 2.39 | -    | .04*  | .04 | 1.37 |
|        | Emotional Constriction   | .235 | .106 | .170 | 2.22 | -    | .03*  | .03 | 1.14 |

Note. \*= Correlation is significant at the 0.01 level (2-tailed). \*\*= Correlation is significant at the 0.05 level (2-tailed).

YSQ = Young Schema Questionnaire. *B*= Unstandardised Coefficient, *SE*=Standard Error,  $\beta$ =Standardised Beta

Coefficient,  $R^2$ =R squared,  $f^2$  = Cohens *f*. GSI = Global Severity Index. VIF = Variance Inflation Factor where a VIF of 1 = No correlation, < 3 = low correlation, > 5 = high correlation).

Supplementary Table S7

Regression Analysis for Schema Change and Symptom Change for the YSQ-L3 and SCL-90 Subscales in the Schema Group

|                  |                                  | YSQ-L3   |           |         |          |          |                |       |      |
|------------------|----------------------------------|----------|-----------|---------|----------|----------|----------------|-------|------|
| SCL-90 Subscales |                                  | <i>B</i> | <i>SE</i> | $\beta$ | <i>t</i> | <i>F</i> | $R^2$ (Change) | $f^2$ | VIF  |
| Step 1           | <b>GSI</b>                       | -        | -         | -       | -        | 4.11     | .36**          | .56   | -    |
| Step 2           | Failure                          | .315     | .095      | .291    | 3.17     | -        | .25**          | .33   | 1.63 |
|                  | Social Isolation                 | .236     | .086      | .224    | 2.73     | -        | .04*           | .04   | 1.43 |
|                  | Emotional Inhibition             | .263     | .113      | .180    | 2.32     | -        | .02*           | .02   | 1.27 |
| Step 1           | <b>Somatisation</b>              | -        | -         | -       | -        | .93      | .11            | -     | -    |
| Step 2           | Punitiveness                     | .364     | .154      | .191    | 2.36     | -        | .04*           | .04   | 1.00 |
| Step 1           | <b>Obsessive/Compulsive</b>      | -        | -         | -       | -        | 3.13     | .30**          | .43   | -    |
| Step 2           | Dependence                       | .531     | .154      | .301    | 3.46     | -        | .21**          | .27   | 1.49 |
|                  | Punitiveness                     | .478     | .157      | .265    | 3.04     | -        | .05*           | .05   | 1.49 |
| Step 1           | <b>Interpersonal Sensitivity</b> | -        | -         | -       | -        | 5.19     | .41**          | .69   | -    |
| Step 2           | Failure                          | .393     | .139      | .242    | 2.82     | -        | .27**          | .37   | 1.72 |
|                  | Social Isolation                 | .388     | .124      | .245    | 3.13     | -        | .05**          | .05   | 1.43 |
|                  | Enmeshment                       | .252     | .102      | .180    | 2.48     | -        | .04*           | .04   | 1.23 |
|                  | Emotional Constriction           | .352     | .165      | .161    | 2.13     | -        | .02*           | .02   | 1.32 |
| Step 1           | <b>Depression</b>                | -        | -         | -       | -        | 3.60     | .33**          | .49   | -    |
| Step 2           | Social Isolation                 | .589     | .134      | .344    | 4.38     | -        | .20**          | .25   | 1.24 |
|                  | Punitiveness                     | .472     | .188      | .205    | 2.52     | -        | .05**          | .05   | 1.34 |
|                  | Entitlement                      | .231     | .099      | .172    | 2.35     | -        | .03*           | .03   | 1.09 |
| Step 1           | <b>Anxiety</b>                   | -        | -         | -       | -        | 2.39     | .25*           | .33   | -    |
| Step 2           | Dependence                       | .470     | .182      | .254    | 2.59     | -        | .15**          | .18   | 1.71 |
|                  | Failure                          | .301     | .142      | .208    | 2.12     | -        | .02*           | .02   | 1.71 |
| Step 1           | <b>Hostility</b>                 | -        | -         | -       | -        | 2.74     | .27**          | .37   | -    |

|        |                          |      |      |      |      |      |       |     |      |
|--------|--------------------------|------|------|------|------|------|-------|-----|------|
| Step 2 | Failure                  | .264 | .144 | .177 | 1.83 | -    | .15** | .18 | 1.73 |
|        | Defectiveness            | .392 | .178 | .206 | 2.21 | -    | .04*  | .04 | 1.60 |
|        | Emotional Inhibition     | .361 | .169 | .179 | 2.14 | -    | .02*  | .02 | 1.29 |
| Step 1 | <b>Phobic anxiety</b>    | -    | -    | -    | -    | 1.36 | .16   | -   | -    |
| Step 2 | Dependence               | .499 | .139 | .282 | 3.58 | -    | .08** | .09 | 1.00 |
|        | <b>Paranoid ideation</b> | -    | -    | -    | -    | 2.55 | .26** | .35 | -    |
| Step 2 | Failure                  | .542 | .138 | .327 | 3.93 | -    | .17** | .20 | 1.27 |
|        | Emotional Inhibition     | .415 | .186 | .186 | 2.23 | -    | .03*  | .03 | 1.27 |
| Step 1 | <b>Psychoticism</b>      | -    | -    | -    | -    | 3.62 | .33** | .49 | -    |
| Step 2 | Punitiveness             | .449 | .120 | .299 | 3.73 | -    | .19** | .23 | 1.26 |
|        | Defectiveness            | .428 | .118 | .291 | 3.63 | -    | .07** | .08 | 1.26 |

Note. \* = Correlation is significant at the 0.01 level (2-tailed). \*\* = Correlation is significant at the 0.05 level (2-tailed).

YSQ = Young Schema Questionnaire. *B* = Unstandardised Coefficient, SE = Standard Error,  $\beta$  = Standardised Beta

Coefficient,  $R^2$  = R squared,  $f^2$  = Cohens *f*. GSI = Global Severity Index. VIF = Variance Inflation Factor where a VIF of 1 = No correlation, < 3 = low correlation, > 5 = high correlation).

#### Supplementary Table S8

Regression Analysis for Schema Change and Symptom Change for the YSQ-S3 and SCL-90 Subscales in the Schema Group

| YSQ-S3                           |          |      |         |          |          |                |       |      |  |
|----------------------------------|----------|------|---------|----------|----------|----------------|-------|------|--|
| SCL-90 Subscales                 | <i>B</i> | SE   | $\beta$ | <i>t</i> | <i>F</i> | $R^2$ (Change) | $f^2$ | VIF  |  |
| Step 1                           |          |      |         |          |          |                |       |      |  |
| <b>GSI</b>                       | -        | -    | -       | -        | 3.60     | .33**          | .49   | -    |  |
| Step 2                           |          |      |         |          |          |                |       |      |  |
| Failure                          | .199     | .083 | .199    | 2.40     | -        | .17**          | .20   | 1.42 |  |
| Emotional Inhibition             | .271     | .097 | .208    | 2.80     | -        | .07**          | .08   | 1.14 |  |
| Defectiveness                    | .235     | .093 | .206    | 2.52     | -        | .04*           | .04   | 1.38 |  |
| Self-Sacrifice                   | .208     | .090 | .176    | 2.32     | -        | .03*           | .03   | 1.19 |  |
| Step 1                           |          |      |         |          |          |                |       |      |  |
| <b>Somatisation</b>              | -        | -    | -       | -        | 1.14     | .14            | .16   | -    |  |
| Step 2                           |          |      |         |          |          |                |       |      |  |
| Vulnerability to Harm            | .348     | .107 | .313    | 3.26     | -        | .04*           | .04   | 1.44 |  |
| Negativity                       | -.289    | .139 | -.199   | -2.07    | -        | .03*           | .03   | 1.44 |  |
| Step 1                           |          |      |         |          |          |                |       |      |  |
| <b>Obsessive/Compulsive</b>      | -        | -    | -       | -        | 3.37     | .32**          | .47   | -    |  |
| Step 2                           |          |      |         |          |          |                |       |      |  |
| Dependence                       | .436     | .107 | .325    | 4.09     | -        | .19**          | .23   | 1.23 |  |
| Mistrust/Abuse                   | .256     | .110 | .181    | 2.32     | -        | .04*           | .04   | 1.17 |  |
| Self-Sacrifice                   | .234     | .118 | .155    | 1.98     | -        | .02*           | .02   | 1.83 |  |
| Step 1                           |          |      |         |          |          |                |       |      |  |
| <b>Interpersonal Sensitivity</b> | -        | -    | -       | -        | 3.71     | .34**          | .52   | -    |  |
| Step 2                           |          |      |         |          |          |                |       |      |  |
| Subjugation                      | .373     | .134 | .231    | 2.79     | -        | .21**          | .27   | 1.47 |  |
| Social Isolation                 | .278     | .126 | .178    | 2.21     | -        | .07**          | .08   | 1.37 |  |
| Emotional Inhibition             | .344     | .147 | .175    | 2.34     | -        | .03*           | .03   | 1.20 |  |
| Failure                          | .289     | .131 | .192    | 2.21     | -        | .02*           | .02   | 1.60 |  |
| Step 1                           |          |      |         |          |          |                |       |      |  |
| <b>Depression</b>                | -        | -    | -       | -        | 2.82     | .28**          | .39   | -    |  |
| Step 2                           |          |      |         |          |          |                |       |      |  |
| Social Isolation                 | .499     | .130 | .297    | 3.83     | -        | .15**          | .18   | 1.13 |  |



|        |                          |      |      |      |      |      |       |     |      |
|--------|--------------------------|------|------|------|------|------|-------|-----|------|
|        | Self-Sacrifice           | .367 | .151 | .192 | 2.44 | -    | .05*  | .05 | 1.16 |
|        | Dependence               | .276 | .137 | .162 | 2.02 | -    | .02*  | .02 | 1.21 |
| Step 1 | <b>Anxiety</b>           | -    | -    | -    | -    | 2.95 | .29** | .41 | -    |
| Step 2 | Dependence               | .370 | .119 | .262 | 3.11 | -    | .17** | .20 | 1.34 |
|        | Emotional Inhibition     | .331 | .136 | .189 | 2.43 | -    | .04*  | .04 | 1.15 |
|        | Defectiveness            | .285 | .125 | .186 | 2.28 | -    | .03*  | .03 | 1.70 |
| Step 1 | <b>Hostility</b>         | -    | -    | -    | -    | 2.73 | .27** | .37 | -    |
| Step 2 | Defectiveness            | .400 | .124 | .254 | 3.22 | -    | .12** | .14 | 1.12 |
|        | Self-Sacrifice           | .339 | .130 | .208 | 2.67 | -    | .06*  | .06 | 1.14 |
|        | Emotional Inhibition     | .287 | .142 | .159 | 2.02 | -    | .02*  | .02 | 1.30 |
| Step 1 | <b>Phobic Anxiety</b>    | -    | -    | -    | -    | 1.10 | .13   | .15 | -    |
| Step 2 | Defectiveness            | .276 | .120 | .189 | 2.31 | -    | .06*  | .06 | 1.07 |
|        | Emotional Inhibition     | .314 | .137 | .188 | 2.30 | -    | .03*  | .03 | 1.07 |
| Step 1 | <b>Paranoid ideation</b> | -    | -    | -    | -    | 2.14 | .23*  | .30 | -    |
| Step 2 | Dependence               | .311 | .135 | .193 | 2.30 | -    | .10** | .11 | 1.24 |
|        | Mistrust/Abuse           | .365 | .138 | .214 | 2.64 | -    | .05*  | .05 | 1.16 |
|        | Enmeshment               | .210 | .106 | .162 | 1.99 | -    | .02*  | .02 | 1.18 |
| Step 1 | <b>Psychoticism</b>      | -    | -    | -    | -    | 3.34 | .31** | .45 | -    |
| Step 2 | Punitiveness             | .326 | .096 | .275 | 3.38 | -    | .18** | .22 | 1.31 |
|        | Defectiveness            | .272 | .098 | .224 | 2.77 | -    | .05*  | .05 | 1.29 |
|        | Emotional Inhibition     | .254 | .104 | .184 | 2.45 | -    | .03*  | .03 | 1.11 |

Note. \* = Correlation is significant at the 0.01 level (2-tailed). \*\* = Correlation is significant at the 0.05 level (2-tailed).

YSQ = Young Schema Questionnaire. B = Unstandardised Coefficient, SE = Standard Error,  $\beta$  = Standardised Beta

Coefficient,  $R^2$  = R squared,  $f^2$  = Cohens  $f$ . GSI = Global Severity Index. VIF = Variance Inflation Factor where a VIF of 1 = No correlation, < 3 = low correlation, > 5 = high correlation).

Supplementary Table S9

Regression Analysis for Pre-Treatment YSQ Change and Symptom Change for Each YSQ Version and DASS-42 Subscales in the Alcohol and Substance Use Group

| YSQ-R                     |          |      |         |          |          |                         |                       |      |
|---------------------------|----------|------|---------|----------|----------|-------------------------|-----------------------|------|
| DASS-42 Subscales         | <i>B</i> | SE   | $\beta$ | <i>t</i> | <i>F</i> | R <sup>2</sup> (Change) | <i>f</i> <sup>2</sup> | VIF  |
| Step 1                    |          |      |         |          |          |                         |                       |      |
| <b>Total Score</b>        | -        | -    | -       | -        | 1.66     | .18**                   | .22                   | -    |
| Step 2                    |          |      |         |          |          |                         |                       |      |
| Vulnerability to Harm     | .054     | .022 | .199    | .054     | -        | .05*                    | .05                   | 1.17 |
| Punitiveness (Other)      | -.226    | .072 | -.248   | -.23     | -        | .04*                    | .04                   | 1.14 |
| Insufficient Self Control | .073     | .029 | .206    | .073     | -        | .03*                    | .03                   | 1.25 |
| Step 1                    |          |      |         |          |          |                         |                       |      |
| <b>Depression</b>         | -        | -    | -       | -        | 1.93     | .21**                   | .27                   | -    |
| Step 2                    |          |      |         |          |          |                         |                       |      |
| Vulnerability to Harm     | .096     | .025 | .288    | 3.82     | -        | .05*                    | .05                   | 1.06 |
| Punitiveness (Other)      | -.275    | .084 | -.247   | -3.27    | -        | .06**                   | .06                   | 1.06 |
| Step 1                    |          |      |         |          |          |                         |                       |      |
| <b>Anxiety</b>            | -        | -    | -       | -        | 1.33     | .15                     | .18                   | -    |
| Step 2                    |          |      |         |          |          |                         |                       |      |
| Insufficient Self Control | .099     | .028 | .275    | 3.47     | -        | .05*                    | .05                   | 1.12 |
| Punitiveness (Other)      | -.174    | .074 | -.187   | -2.37    | -        | .08**                   | .09                   | 1.12 |
| Step 1                    |          |      |         |          |          |                         |                       |      |
| <b>Stress</b>             | -        | -    | -       | -        | 1.27     | .15                     | .18                   | -    |
| Step 2                    |          |      |         |          |          |                         |                       |      |
| Failure                   | .036     | .014 | .192    | 2.53     | -        | .04*                    | .04                   | 1.00 |
| YSQ-L3                    |          |      |         |          |          |                         |                       |      |
| DASS-42 Subscales         | <i>B</i> | SE   | $\beta$ | <i>t</i> | <i>F</i> | R <sup>2</sup> (Change) | <i>f</i> <sup>2</sup> | VIF  |
| Step 1                    |          |      |         |          |          |                         |                       |      |
| <b>Total Score</b>        | -        | -    | -       | -        | 2.17     | .21*                    | .27                   | -    |
| Step 2                    |          |      |         |          |          |                         |                       |      |
| Vulnerability to Harm     | .062     | .021 | .223    | 2.96     | -        | .05*                    | .05                   | 1.00 |
| Step 1                    |          |      |         |          |          |                         |                       |      |
| <b>Depression</b>         | -        | -    | -       | -        | 2.15     | .21*                    | .27                   | -    |
| Step 2                    |          |      |         |          |          |                         |                       |      |
| Vulnerability to Harm     | .063     | .035 | .186    | 1.81     | -        | .05*                    | .05                   | 1.98 |
| Punitiveness              | -.435    | .121 | -.376   | 3.59     | -        | .03*                    | .03                   | 2.07 |
| Self-Sacrifice            | .093     | .045 | .168    | 2.08     | -        | .03*                    | .03                   | 1.24 |
| Negativity                | .128     | .063 | .258    | 2.05     | -        | .02*                    | .02                   | 3.00 |
| Step 1                    |          |      |         |          |          |                         |                       |      |
| <b>Anxiety</b>            | -        | -    | -       | -        | 1.96     | .19*                    | .23                   | -    |
| Step 2                    |          |      |         |          |          |                         |                       |      |
| Subjugation               | .050     | .19  | .197    | 2.59     | -        | .03*                    | .03                   | 1.00 |
| Step 1                    |          |      |         |          |          |                         |                       |      |
| <b>Stress</b>             | -        | -    | -       | -        | 1.76     | .18*                    | .22                   | -    |
| Step 2                    |          |      |         |          |          |                         |                       |      |
| Negativity                | .102     | .034 | .228    | .230     | 3.03     | .05*                    | .05                   | 1.00 |
| YSQ-S3                    |          |      |         |          |          |                         |                       |      |
| DASS-42 Subscales         | <i>B</i> | SE   | $\beta$ | <i>t</i> | <i>F</i> | R <sup>2</sup> (Change) | <i>f</i> <sup>2</sup> | VIF  |
| Step 1                    |          |      |         |          |          |                         |                       |      |
| <b>Total Score</b>        | -        | -    | -       | -        | 1.33     | .14                     | .16                   | -    |
| Step 2                    |          |      |         |          |          |                         |                       |      |
| Negativity                | .092     | .031 | .222    | 2.94     | -        | .05*                    | .05                   | 1.00 |
| Step 1                    |          |      |         |          |          |                         |                       |      |
| <b>Depression</b>         | -        | -    | -       | -        | 1.53     | .16                     | .19                   | -    |
| Step 2                    |          |      |         |          |          |                         |                       |      |
| Vulnerability to Harm     | .069     | .025 | .207    | 2.73     | -        | .04*                    | .04                   | 1.00 |
| Step 1                    |          |      |         |          |          |                         |                       |      |
| <b>Anxiety</b>            | -        | -    | -       | -        | 1.24     | .13                     | .15                   | -    |
| Step 2                    |          |      |         |          |          |                         |                       |      |
| Vulnerability to Harm     | .051     | .021 | .182    | 2.39     | -        | .03*                    | .03                   | 1.00 |
| Step 1                    |          |      |         |          |          |                         |                       |      |
| <b>Stress</b>             | -        | -    | -       | -        | 1.14     | .12                     | .14                   | -    |

Step 2

|            |      |      |      |      |   |      |     |      |
|------------|------|------|------|------|---|------|-----|------|
| Negativity | .112 | .034 | .245 | 3.27 | - | .06* | .06 | 1.00 |
|------------|------|------|------|------|---|------|-----|------|

*Note.* \*= Correlation is significant at the 0.01 level (2-tailed). \*\*= Correlation is significant at the 0.05 level (2-tailed). YSQ = Young Schema Questionnaire. DASS = Depression, Anxiety, and Stress Scale, *B*= Unstandardised Coefficient, *SE*=Standard Error,  $\beta$ =Standardised Beta Coefficient,  $R^2$ =R squared,  $f^2$  = Cohens *f*. GSI = Global Severity Index. VIF = Variance Inflation Factor.
